# Supplementary material for: Inclusion by a fluorenyl host with volatile guests: structures, thermal stability and kineticsElectronic supplementary information (ESI) available: NMR spectra and assignments. See http://www.rsc.org/suppdata/ob/b4/b400721b/
Source: Royal Society of Chemistry journal article supplement (doi:10.1039/b400721b), 2004-01-01
Supplement: b400721b.pdf [file b400721b.pdf]

**Table 1.**  $^{13}\text{C}$  Solution NMR isotropic shifts and assignments of host **H**

| Shift        | Assignment C atom |    |
|--------------|-------------------|----|
| <b>WEB24</b> |                   |    |
| 151.3        | 1A                | Q  |
| 144.2        | 9                 | Q  |
| 139.0        | 4A                | Q  |
| 138.3        | 6                 | Q  |
| 128.6        | 1                 | CH |
| 128.0        | 7                 | CH |
| 126.2        | 3                 | CH |
| 125.7        | 8                 | CH |
| 124.7        | 2                 | CH |
| 120.1        | 4                 | CH |
| 82.4         | 5                 | Q  |

**Table 3.**  $^{13}\text{C}$  Solid State NMR isotropic shifts and assignments of host-guest compounds

| Shift              | Assignment C atom |                 |
|--------------------|-------------------|-----------------|
| <b>H•3DIOX</b>     |                   |                 |
| <b>H</b>           |                   |                 |
| 154.1, 152.4       | 1A, 8A            | Q               |
| 144.3-138.1        | 4A, 5A, 10, 13    | Q               |
| 129.5-120.1        | 1-8,11,12, 14,15  | CH              |
| 83.6               | 9                 | Q               |
| <b>1,4-DIOXANE</b> |                   |                 |
| 68.0               | 1                 | CH <sub>2</sub> |

**Table 2.**  $^{13}\text{C}$  Solid State NMR isotropic shifts and assignments of host **WEB24**

| Shift                                                    | Assignment C atom      |    |
|----------------------------------------------------------|------------------------|----|
| <b>WEB24</b>                                             |                        |    |
| 149.4                                                    | 1A, 8A                 | Q  |
| 144.7, 142.4,<br>138.2, 136.4                            | 4A, 5A, 10, 13         | Q  |
| 130.6, 128.2,<br>126.4, 125.3,<br>123.8, 120.3,<br>118.8 | 1-8, 11, 12, 14,<br>15 | CH |
| 83.2                                                     | 9                      | Q  |

**Notes for tables 1, 2 and 3**

- Q = quaternary carbon
- Partial assignments are given where the complete assignment is not known.
